# Supplementary material for: Does Tai Chi improve psychological well-being and quality of life in patients with cardiovascular disease and/or cardiovascular risk factors? A systematic review protocol
Source: PubMed Central journal article supplement — BMJ Open. 2017 Aug 18;7(8):e014507. doi: 10.1136/bmjopen-2016-014507 (PMC5724100; doi:10.1136/bmjopen-2016-014507), 2017-08-18
Supplement: bmjopen-2016-014507.draft_revisions.pdf [file bmjopen-2016-014507.draft_revisions.pdf]

# BMJ Open

## Does Tai Chi improve psychological well-being and quality of life in patients with cardiovascular disease and/or cardiovascular risk factors? a systematic review protocol

|                                 |                                                                                                                                                                                                                                                                                                                                                                                                                                                                                                                                                                                                                                                                                                                                                                                                                                                                                                                                                                                                     |
|---------------------------------|-----------------------------------------------------------------------------------------------------------------------------------------------------------------------------------------------------------------------------------------------------------------------------------------------------------------------------------------------------------------------------------------------------------------------------------------------------------------------------------------------------------------------------------------------------------------------------------------------------------------------------------------------------------------------------------------------------------------------------------------------------------------------------------------------------------------------------------------------------------------------------------------------------------------------------------------------------------------------------------------------------|
| Journal:                        | <i>BMJ Open</i>                                                                                                                                                                                                                                                                                                                                                                                                                                                                                                                                                                                                                                                                                                                                                                                                                                                                                                                                                                                     |
| Manuscript ID                   | bmjopen-2016-014507                                                                                                                                                                                                                                                                                                                                                                                                                                                                                                                                                                                                                                                                                                                                                                                                                                                                                                                                                                                 |
| Article Type:                   | Protocol                                                                                                                                                                                                                                                                                                                                                                                                                                                                                                                                                                                                                                                                                                                                                                                                                                                                                                                                                                                            |
| Date Submitted by the Author:   | 28-Sep-2016                                                                                                                                                                                                                                                                                                                                                                                                                                                                                                                                                                                                                                                                                                                                                                                                                                                                                                                                                                                         |
| Complete List of Authors:       | <p>Yang, Guo-Yan; Western Sydney University School of Science and Health, National Institute of Complementary Medicine; Beijing University of Chinese Medicine, Centre for Evidence-Based Chinese Medicine</p> <p>Li, Yuan; Beijing University of Chinese Medicine, Centre for Evidence-Based Chinese Medicine</p> <p>Cao, Hui; Beijing University of Chinese Medicine, Centre for Evidence-Based Chinese Medicine</p> <p>Klupp, Nerida; Western Sydney University School of Science and Health, National Institute of Complementary Medicine</p> <p>Liu, Jianping; Beijing University of Traditional Chinese Medicine, Center for Evidence-Based Chinese Medicine</p> <p>Bensoussan, Alan; Western Sydney University, National Institute of Complementary Medicine</p> <p>Kiat, Hosen; University of New South Wales, Faculty of Medicine; Cardiac Health Institute</p> <p>Chang, Dennis; Western Sydney University School of Science and Health, National Institute of Complementary Medicine</p> |
| <b>Primary Subject Heading</b>: | Cardiovascular medicine                                                                                                                                                                                                                                                                                                                                                                                                                                                                                                                                                                                                                                                                                                                                                                                                                                                                                                                                                                             |
| Secondary Subject Heading:      | Complementary medicine, Sports and exercise medicine, Cardiovascular medicine                                                                                                                                                                                                                                                                                                                                                                                                                                                                                                                                                                                                                                                                                                                                                                                                                                                                                                                       |
| Keywords:                       | Tai Chi, stress, depression, anxiety, cardiovascular disease, well being                                                                                                                                                                                                                                                                                                                                                                                                                                                                                                                                                                                                                                                                                                                                                                                                                                                                                                                            |
|                                 |                                                                                                                                                                                                                                                                                                                                                                                                                                                                                                                                                                                                                                                                                                                                                                                                                                                                                                                                                                                                     |

SCHOLARONE™  
Manuscripts

1  
2  
3 **Title: Does Tai Chi improve psychological well-being and quality of life in**  
4 **patients with cardiovascular disease and/or cardiovascular risk factors? a**  
5 **systematic review protocol**  
6  
7

8  
9 Guoyan Yang<sup>1,2</sup>, Wenyuan Li<sup>2</sup>, Huijuan Cao<sup>2</sup>, Nerida Klupp<sup>1</sup>, Jianping Liu<sup>2</sup>, Alan  
10 Bensoussan<sup>1</sup>, Hosen Kiat<sup>3,4,5,6</sup>, Dennis Chang<sup>1</sup>  
11

12  
13  
14 <sup>1</sup>National Institute of Complementary Medicine, Western Sydney University, Sydney,  
15 NSW 2751, Australia  
16

17  
18 <sup>2</sup>Center for Evidence-Based Chinese Medicine, Beijing University of Chinese  
19 Medicine, Beijing 100029, China  
20

21  
22 <sup>3</sup>Faculty of Medicine, University of New South Wales, Kensington, NSW 2052,  
23 Australia  
24

25  
26 <sup>4</sup>School of Medicine, University of Western Sydney, Locked Bag 1797, Penrith, NSW  
27 2751, Australia  
28

29  
30 <sup>5</sup>Faculty of Medicine and Health Sciences, Macquarie University, NSW 2109,  
31 Australia  
32

33  
34 <sup>6</sup>Cardiac Health Institute, Sydney, NSW 2122, Australia  
35

36  
37 Correspondence to:

38  
39 Dennis Chang

40  
41 National Institute of Complementary Medicine, Western Sydney University, Sydney,  
42 NSW 2751, Australia  
43

44  
45 Tel: +61 (02) 4620 3278

46  
47 Email: [D.Chang@westernsydney.edu.au](mailto:D.Chang@westernsydney.edu.au)  
48

49  
50 **Word count:** 2239 words  
51  
52  
53  
54  
55  
56  
57  
58  
59  
60

## ABSTRACT

**Introduction** Cardiovascular disease (CVD) is a leading cause of morbidity and mortality worldwide. Psychological risk factors such as stress, anxiety, and depression are known to play a significant and independent role in the development and progression of CVD and its risk factors. Tai Chi has been reported as potentially effective for health and well-being. It is of value to assess the effectiveness and safety of Tai Chi on psychological well-being and quality of life in people with CVD and/or cardiovascular risk factors.

**Methods and analysis** We will include all relevant randomised controlled trials on Tai Chi for stress, anxiety, depression, psychological well-being, and quality of life in people with CVD and cardiovascular risk factors. Literature searching will be conducted until 31<sup>st</sup> December 2016 from major English and Chinese databases. Two authors will conduct data selection and extraction independently. Quality assessment will be conducted using the risk of bias tool recommended by the Cochrane Collaboration. We will conduct data analysis using Cochrane's RevMan Software. Forest plots and summary of findings tables will illustrate the results from a meta-analysis if sufficient studies are identified.

**Ethics and dissemination** Ethics approval is not required as this study will not involve patients. The results of this study will be submitted to a peer-reviewed journal for publication, to inform both clinical practice and further research on Tai Chi and CVDs.

**Discussion** This review will summarize the evidence on Tai Chi for psychological well-being and quality of life in people with CVD and their risk factors. We anticipate that the results of this review would be useful for healthcare professionals and researchers on Tai Chi and CVDs.

**Trial registration number** International Prospective Register for Systematic Reviews

(PROSPERO) number CRD42016042905.

**Keywords:** Tai Chi, well-being, stress, depression, anxiety, cardiovascular disease

**Strengths and limitations of this study:**

- This systematic review will synthesise the evidence on Tai Chi for psychological well-being and quality of life in people with cardiovascular disease and risk factors for the first time.
- One limitation of this study is that significant heterogeneity may appear due to the variations in psychological measurements, durations, frequencies, styles (such as Chen, Yang, Wu, and Sun style) or forms (such as 24-form, 54-form, 83-form) of Tai Chi.
- Another limitation of this study is that the blinding of participants and personnel might not be possible in included studies which might affect the interpretation of results.

## INTRODUCTION

Cardiovascular disease (CVD) is the number one cause of morbidity and mortality worldwide, and an estimated 17.5 million people died from CVD in 2012 representing 31% of all global deaths<sup>1</sup>. In the UK, the total CVD mortality declined by 68% between 1980 and 2013, while the hospital admissions increased by over 46000 between 2010/2011 and 2013/2014<sup>2</sup>. Current statistics of premature deaths due to CVD ranges from 4% in high-income countries to astonishing estimate of 80% of the total CVD mortality occur in developing countries<sup>3</sup>. In addition, the disease burden on the individual and society comes not only from deaths, but also from those living with CVD. The American Heart Association estimated that the total direct and indirect cost of CVD in the US alone for 2010 was in excess of US\$500 billion<sup>4</sup>.

According to the World Health Organization (WHO)<sup>1</sup>, the major risk factors of CVD are related to lifestyles, including tobacco smoking, unhealthy diet, physical inactivity and alcohol abuse. These factors may lead to other contributing risk factors of CVD, such as hypertension, diabetes, hyperlipidaemia, overweight and obesity. Other determinants of CVD include poverty, stress, depression, anxiety, ageing and hereditary factors.

Psychological risk factors such as stress, anxiety, and depression are known to play a significant and independent role in the development and progression of CVD and its risk factors, with many of these factors being correlated with each other<sup>5-8</sup>. Stress in research focuses on three major perspectives: environmental (focusing on stressors or life events), psychological (assessing subjective stress appraisal and affective reactions), and biological (assessing the activation of the physiological systems involved in the stress response)<sup>9</sup>. Anxiety has been defined as a stimulus, a trait, a motive and a drive, which can be differentiated into state anxiety (an emotional condition at a period of time), and trait anxiety (a personality characteristic)<sup>10</sup>. The prevalence of anxiety in people with coronary heart disease varies from 12.0% to 41.8% in men, and 21.5% to 63.7% in women<sup>11</sup>. We define depression as either elevated

1  
2  
3 depressive symptoms on a validated depression scale or a formal diagnosis of major  
4 depressive disorder. Between 31-45% of people with coronary heart disease suffer  
5 from clinically significant depressive symptoms, and 15-20% of them meet criteria of  
6 major depressive disorder which is roughly threefold higher than in the general  
7 population<sup>12</sup>. It is now well established that depression is related not only to the  
8 incidence of CVD but also an independent risk factor for cardiac morbidity and  
9 mortality. Therefore, psychological management is necessary for people with CVD.  
10  
11  
12  
13  
14  
15  
16  
17

18 Most CVDs can be prevented by addressing these risk factors mentioned above.  
19 Medical treatment is necessary for people with hypertension, diabetes, and  
20 hyperlipidaemia to reduce cardiovascular risk and prevent heart attacks and strokes<sup>1</sup>.  
21 For people with established CVD, it is important to prevent the occurrence of further  
22 cardiovascular events such as acute myocardial infarction. However, major treatments  
23 target only at physical conditions. There is still insufficient evidence to support the  
24 introduction of psychological management strategies for people with CVD including  
25 cardiac rehabilitation and exercise programs, general support, cognitive behavioral  
26 therapy, anti-depressant medication, and combined approaches<sup>13</sup>. Acceptable and  
27 effective psychological interventions for people with CVD and/or cardiovascular risk  
28 factors are warranted.  
29  
30  
31  
32  
33  
34  
35  
36  
37  
38  
39  
40

41 Tai Chi originated in China and purportedly developed by a famous martial artist  
42 Wang-Ting Chen towards the end of Ming Dynasty (18<sup>th</sup> Century A.D.)<sup>14</sup>. Tai Chi  
43 comprehensively incorporates the essence of Chinese folk and military martial arts,  
44 ancient breathing and meditative techniques, Chinese philosophy of *yin* and *yang*, and  
45 traditional Chinese medicine theory<sup>15</sup>. In recent years, studies on Tai Chi for CVDs  
46 and risk factors have flourished. An increasing amount of studies have demonstrated  
47 multiple physical and psychological benefits of Tai Chi, including reduction of stress,  
48 anxiety, depression, and improving quality of life.  
49  
50  
51  
52  
53  
54  
55  
56  
57

58 Five systematic reviews<sup>16-20</sup> have reported the beneficial effects of Tai Chi on  
59  
60

1  
2  
3  
4  
5  
6  
7  
8  
9  
10  
11  
12  
13  
14  
15  
16  
17  
18  
19  
20  
21  
22  
23  
24  
25  
26  
27  
28  
29  
30  
31  
32  
33  
34  
35  
36  
37  
38  
39  
40  
41  
42  
43  
44  
45  
46  
47  
48  
49  
50  
51  
52  
53  
54  
55  
56  
57  
58  
59  
60

psychological well-being, including reduction of stress, anxiety, and depression in wide population, but the findings showed methodological limitations of included trials, variations in study design or comparisons, heterogeneous outcomes or small sample size. Two out of the five systematic reviews only searched literature from English databases<sup>16,20</sup>. Wang C et al.<sup>19</sup> summarized and analyzed 40 studies (including RCT, non-randomised trials and observational studies), in which 29 psychological measurements were identified, and concluded that Tai Chi significantly improved psychological well-being including reduced stress, anxiety, depression and mood disturbance and increased self-esteem. Recently, more clinical trials have been published in this area. However, little is known about the effect of Tai Chi for psychological well-being and quality of life measured by validated instruments specifically in people with CVD and/or cardiovascular risk factors.

The objective of this systematic review is to assess the effectiveness and safety of Tai Chi intervention for stress, anxiety, depression, other psychological well-being and quality of life in people with CVD and/or cardiovascular risk factors.

## **METHODS and ANALYSIS**

### **Inclusion and Exclusion Criteria**

#### *Type of study*

We will include only parallel randomised controlled trials (RCT) and only the first phase data and outcomes of randomised cross-over trials will be used in any data analysis.

#### *Type of participants*

We will include participants aged 40 years or older with a diagnosis of a cardiovascular disease (such as coronary heart disease, stroke, myocardial infarction and hypertension) or with cardiovascular risk factors (including hypertension, diabetes, and/or hyperlipidaemia). No limitation of gender will be applied.

### Type of intervention

Any types of Tai Chi will be eligible, regardless of the forms (such as 24-form, 54-form, 83-form Tai Chi), styles (such as Chen, Yang, Wu and Sun style). The duration should be at least one month with a frequency at least once per week.

### Type of control

No treatment, other forms of exercise, or conventional treatment will be eligible. Comparisons will also include a co-intervention if applied in all arms.

### Type of outcome

The primary outcomes are psychological status of stress measured by validated instruments and adverse events. The secondary outcomes are other psychological status including anxiety, depression, mood disturbance, self-esteem and quality of life measured by validated instruments.

### **Search Strategies**

We aim to identify all relevant RCTs regardless of language or publication status (e.g. published, unpublished, in press, or in progress). The English searching terms will include “Tai Chi”, “Tai Chi Chuan”, “Tai Chi Chih”, “ta’i chi”, “Tai Ji Quan”, “taijiquan”, “cardiovascular disease”, “hypertension”, “high blood pressure”, “diabetes”, “hyperlipidaemia”, “high cholesterol”, “randomized controlled trial”, “randomised controlled trial”, “controlled clinical trial”, “randomly”, “clinical”, “trial”, “random”, “randomised” and “randomized”. The Chinese searching terms will include Tai Chi (“*Tai\_ji*”, or “*Tai\_ji\_chuan*”), cardiovascular disease (“*Xin\_xue\_guan\_bing*”), cardiovascular risk factors (“*Gao\_xue\_ya* (hypertension)”, “*Tang\_niao\_bing* (diabetes)”, “*Gao\_xue\_zhi* (hyperlipidaemia)”) and randomized (“*sui\_ji*”). Examples of detailed search strategies for one English database and one Chinese database are available in Table 1 (See Table 1). We will apply a similar strategy for other electronic databases.



Table 1 – Search strategies

| Database | Number | Search items                                                                                                                                                                                    |
|----------|--------|-------------------------------------------------------------------------------------------------------------------------------------------------------------------------------------------------|
| PubMed   | #1     | [Title/Abstract] (“Tai Chi” OR “Tai ji” OR “Tai Chi Chih” OR “Ta’i chi” OR “taichi” OR “tai chi chuan” OR “taichi chuan” OR “taiji” OR “Tai Ji Quan” OR “taijiquan” OR “martial arts”)          |
|          | #2     | [Title/Abstract] (“cardiovascular disease” OR “hypertension” OR “high blood pressure” OR “diabetes” OR “hyperlipidaemia” OR “high cholesterol”)                                                 |
|          | #3     | [All fields] (“randomized controlled trial” OR “randomised controlled trial” OR “controlled clinical trial” OR “randomly” OR “clinical” OR “trial” OR “random” OR “randomised” OR “randomized”) |
|          | #4     | #1 and #2 and 3#                                                                                                                                                                                |
| CNKI     | #1     | [Abstract] (“ <i>Tai_ji</i> ” (Tai Chi) OR “ <i>Tai_ji_quan</i> ” (Tai Chi))                                                                                                                    |
|          | #2     | [Abstract] (“ <i>Xin_xue_guan_bing</i> ” (cardiovascular disease) OR “ <i>Gao_xue_ya</i> ” (hypertension) OR “ <i>Tang_niao_bing</i> ” (diabetes) OR “ <i>Gao_xue_zhi</i> ” (hyperlipidaemia))  |
|          | #3     | [All fields] (“ <i>sui_ji</i> ” (randomized or randomised))                                                                                                                                     |
|          | #4     | #1 and #2 and 3#                                                                                                                                                                                |

Note: CNKI, China National Knowledge Infrastructure.

We will conduct electronic searches from the following databases until 31<sup>st</sup> December 2016: Cochrane Heart Review Group Specialised Trials Register, Cochrane Central Register of Controlled Trials (CENTRAL), Cochrane Library (2017, Issue 1), MEDLINE (from 1946), EMBASE (from 1974), PubMed (from 1966), Sino-Med database (CBM, from 1978), China National Knowledge Infrastructure (CNKI, from 1979), VIP Journal Integration Platform (VJIP, from 1989), and Wanfang Data Chinese database (from 1985).

We will also search the following trials registers to identify those completed trials and request for unpublished data until 31<sup>st</sup> December 2016: Current Controlled Trials ([www.controlled-trials.com](http://www.controlled-trials.com)), US National Institutes of Health Ongoing Trials Register ([www.clinicaltrials.gov](http://www.clinicaltrials.gov)), Australian New Zealand Clinical Trials Registry ([www.anzctr.org.au](http://www.anzctr.org.au)), and the World Health Organization International Clinical Trials

Registry platform (www.who.int/trialsearch). Additional clinical trials will be identified by searching the reference lists of relevant trials. Authors of identified studies will be also contacted to identify other studies.

## Data Selection and Extraction

### Selection of studies

Two authors (GYG and WYL) will screen the titles and abstracts independently. We will retrieve full texts of all potentially relevant studies. Any disagreement about the selection of studies will be resolved by discussion, and another author will arbitrate when necessary. The selection procedure is shown in a PRISMA flow chart (See figure 1).

### Data Extraction and Management

Two authors (GYG and WYL) will extract the data from the included trials independently by using Epidata 2.8 software. Any disagreements will be resolved by discussion with a third author. The extracted data will include the following information: (1) publication information: authors, country, journal name, year of publication.; (2) study designs: method of random number generation and allocation concealment, details of blinding methods; (3) participants: sample size, characteristics of participants (e.g. age, gender, duration of disorder, and severity of disorder); (4) intervention: type and/or form of Tai Chi, details of treatment and control; and (5) outcome data: outcomes measures, main data of the outcomes. In case of missing data or having unclear information, we will contact the original authors to clarify the information. A pre-defined data extraction form developed based on the recommendation of the Cochrane Collaboration<sup>21</sup> is available in **Table 2**.

**Table 2** – Data extraction form

|                                                                                                               |  |
|---------------------------------------------------------------------------------------------------------------|--|
| Review title or ID                                                                                            |  |
| Study ID ( <i>surname of first author and year first full report of study was published e.g. Smith 2001</i> ) |  |

| <b>General Information</b>                                                                                                                                      |  |
|-----------------------------------------------------------------------------------------------------------------------------------------------------------------|--|
| Date form completed<br>(dd/mm/yyyy)                                                                                                                             |  |
| Name/ID of person extracting data                                                                                                                               |  |
| Reference citation                                                                                                                                              |  |
| Study author contact details                                                                                                                                    |  |
| <b>Study Methods</b> (extract information from descriptions as stated in report/paper)                                                                          |  |
| <b>Design</b> (e.g. parallel, crossover)                                                                                                                        |  |
| <b>Start date</b>                                                                                                                                               |  |
| <b>End date</b>                                                                                                                                                 |  |
| <b>Duration of participation</b> (from recruitment to last follow-up)                                                                                           |  |
| <b>Participants</b> (extract the description as stated in report/paper. Include comparative information for each intervention or comparison group if available) |  |
| Setting (including location and social context)                                                                                                                 |  |
| Inclusion criteria                                                                                                                                              |  |
| Exclusion criteria                                                                                                                                              |  |
| Total no. randomised                                                                                                                                            |  |
| Baseline imbalances                                                                                                                                             |  |
| Withdrawals and exclusions (if not provided below by outcome)                                                                                                   |  |
| Age                                                                                                                                                             |  |
| Sex                                                                                                                                                             |  |
| Illness and Severity                                                                                                                                            |  |
| Co-morbidities                                                                                                                                                  |  |
| Other relevant socio-demographics                                                                                                                               |  |
| Subgroups measured                                                                                                                                              |  |
| Subgroups reported                                                                                                                                              |  |
| <b>Intervention groups</b> (extract the description as stated in report/paper. Copy and paste table for each intervention and comparison group)                 |  |
| Group name                                                                                                                                                      |  |
| No. randomised to group                                                                                                                                         |  |

|                                                    |                                                                                                                     |                                                                                           |
|----------------------------------------------------|---------------------------------------------------------------------------------------------------------------------|-------------------------------------------------------------------------------------------|
| 1<br>2<br>3<br>4<br>5<br>6<br>7                    | Description ( <i>include sufficient details, e.g. style, form, components</i> )                                     |                                                                                           |
| 8<br>9                                             | Duration of treatment                                                                                               |                                                                                           |
| 10<br>11<br>12<br>13                               | Timing ( <i>e.g. frequency, duration of each practice</i> )                                                         |                                                                                           |
| 14<br>15<br>16<br>17                               | Learning method ( <i>e.g. DVD, instructors, one-to-one, in group</i> )                                              |                                                                                           |
| 18<br>19<br>20<br>21<br>22                         | Providers ( <i>e.g. a Tai Chi instructor with 10 years of experience etc. if relevant</i> )                         |                                                                                           |
| 23<br>24                                           | Co-interventions                                                                                                    |                                                                                           |
| 25<br>26                                           | Compliance                                                                                                          |                                                                                           |
| 27<br>28<br>29                                     | <b>Outcomes</b> (extract the description as stated in report/paper. <i>Copy and paste table for each outcome.</i> ) |                                                                                           |
| 30                                                 | Outcome name                                                                                                        |                                                                                           |
| 31<br>32<br>33<br>34<br>35                         | Time points measured ( <i>specify whether from start or end of intervention</i> )                                   |                                                                                           |
| 36<br>37                                           | Time points reported                                                                                                |                                                                                           |
| 38<br>39<br>40<br>41                               | Outcome definition ( <i>with diagnostic criteria if relevant</i> )                                                  |                                                                                           |
| 42<br>43<br>44                                     | Person measuring/ reporting                                                                                         |                                                                                           |
| 45<br>46<br>47<br>48<br>49                         | Scales: upper and lower limits ( <i>indicate whether high or low score is good</i> )                                |                                                                                           |
| 50<br>51                                           | Is outcome/tool validated?                                                                                          | <input type="checkbox"/> Yes <input type="checkbox"/> No <input type="checkbox"/> Unclear |
| 52<br>53<br>54<br>55<br>56<br>57<br>58<br>59<br>60 | Imputation of missing data ( <i>e.g. assumptions made for ITT analysis</i> )                                        |                                                                                           |

|                                                                                 |                            |                          |                          |                          |                                                                                         |                  |  |
|---------------------------------------------------------------------------------|----------------------------|--------------------------|--------------------------|--------------------------|-----------------------------------------------------------------------------------------|------------------|--|
| Assumed risk estimate<br>(e.g. baseline or population risk noted in Background) |                            |                          |                          |                          |                                                                                         |                  |  |
| <b>Results</b>                                                                  | <i>Dichotomous outcome</i> | <b>Intervention</b>      |                          | <b>Comparison</b>        |                                                                                         |                  |  |
|                                                                                 |                            | No. with event           | Total in group           | No. with event           | Total in group                                                                          |                  |  |
|                                                                                 |                            |                          |                          |                          |                                                                                         |                  |  |
| <i>Continuous outcome</i>                                                       | <b>Intervention</b>        |                          | <b>Comparison</b>        |                          |                                                                                         |                  |  |
|                                                                                 | Mean                       | SD                       | No. Participants         | Mean                     | SD                                                                                      | No. Participants |  |
|                                                                                 |                            |                          |                          |                          |                                                                                         |                  |  |
| <b>Risk of Bias assessment</b>                                                  |                            |                          |                          |                          |                                                                                         |                  |  |
| Domain                                                                          |                            | Risk of bias             |                          |                          | Support for judgement (include direct quotes where available with explanatory comments) |                  |  |
|                                                                                 |                            | Low                      | High                     | Unclear                  |                                                                                         |                  |  |
| Random sequence generation (selection bias)                                     |                            | <input type="checkbox"/> | <input type="checkbox"/> | <input type="checkbox"/> |                                                                                         |                  |  |
| Allocation concealment (selection bias)                                         |                            | <input type="checkbox"/> | <input type="checkbox"/> | <input type="checkbox"/> |                                                                                         |                  |  |
| Blinding of outcome assessment (detection bias)                                 |                            | <input type="checkbox"/> | <input type="checkbox"/> | <input type="checkbox"/> |                                                                                         |                  |  |
| Incomplete outcome data (attrition bias)                                        |                            | <input type="checkbox"/> | <input type="checkbox"/> | <input type="checkbox"/> |                                                                                         |                  |  |
| Selective outcome reporting? (reporting bias)                                   |                            | <input type="checkbox"/> | <input type="checkbox"/> | <input type="checkbox"/> |                                                                                         |                  |  |
| Other bias                                                                      |                            | <input type="checkbox"/> | <input type="checkbox"/> | <input type="checkbox"/> |                                                                                         |                  |  |
| <b>Other information</b> (extract the description as stated in report/paper)    |                            |                          |                          |                          |                                                                                         |                  |  |
| Key conclusions of authors                                                      |                            |                          |                          |                          |                                                                                         |                  |  |
| Notes:                                                                          |                            |                          |                          |                          |                                                                                         |                  |  |

**Quality Assessment**

We will use the risk of bias tool provided by the Cochrane Handbook for Systematic Reviews of Interventions<sup>22</sup> to assess the methodical quality of included studies. We

1  
2  
3 will assess the following categories of bias for each study: selection bias (random  
4 sequence generation and allocation concealment); detection bias (blinding of outcome  
5 assessment); attrition bias (incomplete outcome data); reporting bias (selective  
6 reporting); and other bias. We will not report performance bias, considering the  
7 difficulty to blind the participants and personnel in Tai Chi study. For each item, there  
8 are three potential bias judgements: 'low risk', 'high risk', or 'unclear risk'. A clinical  
9 trial meeting all criteria will be judged as having a low risk of bias, a trial meeting  
10 none of the criteria will be judged as having a risk of bias, and a trial with insufficient  
11 information to judge will be classified as unclear risk of bias. Any disagreements will  
12 be resolved by discussion, with involvement a third author where necessary.  
13  
14  
15  
16  
17  
18  
19  
20  
21  
22  
23

### 24 **Data Synthesis**

25 We will summarise data using risk ratios (RR) with 95% confidence intervals (CI) for  
26 dichotomous outcomes or mean difference (MD) with 95% CI for continuous  
27 outcomes. We will assess clinical heterogeneity according to the characteristics of the  
28 included studies and the participants, details of the intervention or control, and types  
29 of outcome measurements. We will assess statistical heterogeneity by using the  $I^2$   
30 statistic, and heterogeneity will be regarded as substantial if the  $I^2$  statistic is greater  
31 than 50%.  
32  
33  
34  
35  
36  
37  
38  
39  
40

41 We will perform statistical analyses by the Cochrane's Review Manager software  
42 (version 5.3). We will pool data if the  $I^2$  statistic is less than 75% and the clinical  
43 heterogeneity among trials is acceptable. We will use random-effects model to  
44 conduct the meta-analysis unless the  $I^2$  statistic is less than 25%. Forest plots will  
45 visualise the results of the meta-analysis if there are more than 10 included trials in  
46 one meta-analysis.  
47  
48  
49  
50  
51

### 52 Subgroup analyses

53 To explore whether the treatment effects are different in different subgroups, we plan  
54 to conduct subgroup analyses for different psychological measurements, durations,  
55  
56  
57  
58  
59  
60

1  
2  
3 frequencies, styles (such as Chen, Yang, Wu and Sun style) or forms (such as 24-form,  
4 54-form and 83-form Tai Chi) of Tai Chi, if sufficient studies are identified. We will  
5 also calculate the incidence rates of different types of adverse events.  
6  
7  
8  
9

### 10 Sensitivity analysis

11 To ensure the robustness of evidence, we will perform sensitivity analysis to assess  
12 the impact of studies with high risk of bias. We will compare the results to decide  
13 whether studies with lower quality should be excluded on the basis of sample size,  
14 strength of evidence and influence on pooled effect size.  
15  
16  
17  
18  
19  
20  
21

### 22 **Grading the quality of evidence**

23 We will generate 'Summary of findings' (SoF) tables for the primary outcomes using  
24 GRADEPro software (version 3.2), to assist health decision-making for individual  
25 patients. The SoF tables will demonstrate the overall quality of the body of evidence  
26 for clinical outcomes only from results of meta-analysis, by using Grading of  
27 Recommendations Assessment, Development and Evaluation (GRADE) criteria  
28 (study limitations, consistency of effect, imprecision, indirectness, and publication  
29 bias).  
30  
31  
32  
33  
34  
35  
36  
37  
38

### 39 **ETHICS AND DISSEMINATION**

40 Formal ethical approval is not required because all data used in this study will be  
41 anonymous with no concerns regarding privacy. This systematic review will  
42 summarize the evidence on the effectiveness and safety of Tai Chi for psychological  
43 well-being and quality of life in people with CVD and CVD risk factors. The results  
44 of this study will be disseminated through a peer-reviewed journal for publication.  
45  
46  
47  
48  
49  
50

### 51 **DISCUSSION**

52 Results from this systematic review will be valuable for clinical practice and research  
53 on Tai Chi and CVD. To the best of our knowledge, this is the first systematic review  
54 that will examine Tai Chi on psychological well-being and quality of life in people  
55  
56  
57  
58  
59  
60

1  
2  
3 with CVD and/or CVD risk factors. The findings of this systematic review may be  
4 applied in clinical practice for the prevention, treatment and rehabilitation of CVDs.  
5  
6 Gaps in the literature will be identified to provide implications for future research on  
7  
8 Tai Chi for CVD.  
9

10  
11  
12 One limitation of this study is that significant heterogeneity may appear due to the  
13 various styles (such as Chen, Yang, Wu and Sun style) and forms (such as 24-form,  
14 54-form and 83-form Tai Chi) of Tai Chi, durations and frequencies. We plan to  
15 conduct subgroup analyses to explore the differences between different subgroups.  
16  
17 Another limitation of this study is that performance bias of included studies might be  
18 at high risk, because blinding of participants and personnel in included studies is  
19 unlikely. We plan to report the blinding of outcome assessment, and conduct  
20 sensitivity analysis to assess the impact of studies with high risk of bias.  
21  
22  
23  
24  
25  
26  
27  
28  
29

### 30 **Authors' contributions**

31 GYY, NK and DC designed and conceived the study. GYY drafted and revised the  
32 study protocol with contributions from WYL, HJC, NK, JPL, AB, HK and DC. GYY  
33 and WYL will conduct literature search and selection. GYY and WYL will  
34 independently perform data extraction and assessment of quality. GYY will conduct  
35 the data analysis. All authors read and approved the final manuscript of the study  
36 protocol.  
37  
38  
39  
40  
41  
42  
43  
44

### 45 **Acknowledgments**

46 This research received no specific grant from any funding agency in the public,  
47 commercial or not-for-profit sectors. However, the first author (GYY) was supported  
48 by the Research Training Scheme from Western Sydney University, International  
49 Postgraduate Research Scholarship (IPRS) and Australian Postgraduate Award  
50 (International) from Western Sydney University.  
51  
52  
53  
54  
55  
56  
57

### 58 **Competing interest**



The authors declare no competing interests.

## REFERENCES

1. WHO. Cardiovascular disease (CVDs). 2015. Available at <http://www.who.int/mediacentre/factsheets/fs317/en> (accessed 05 September, 2016).
2. Bhatnagar P, Wickramasinghe K, Wilkins E, et al. Trends in the epidemiology of cardiovascular disease in the UK. *Heart* Published Online First: 22 August 2016. doi: 10.1136/heartjnl-2016-309573.
3. Mendis S, Puska P, Norrving B. Global Atlas on Cardiovascular Disease Prevention and Control. 2011, Geneva: World Health Organization.
4. Lloyd-Jones D, Adams RJ, Brown TM, et al. Heart disease and stroke statistics-2010 update. *Circulation* 2010; 121 (7): e46-e215.
5. Albus C. Psychological and social factors in coronary heart disease. *Ann Med* 2010; 42(7): 487-494.
6. Nekouei ZK, Doost HT, Yousefy A, et al. The relationship of Alexithymia with anxiety-depression-stress, quality of life, and social support in coronary heart disease (A psychological model). *J Educ health Promot* 2014; 3: 68.
7. Player MS, Peterson LE. Anxiety disorder, hypertension, and cardiovascular risk: a review. *Int J Psychiatry Med* 2011; 41(4): 365-377.
8. Wiltink J, Beutel ME, Till Y, et al. Prevalence of distress, comorbid conditions and well-being in the general population. *J Affect Disord* 2011; 130(3): 429-437.
9. Lee EH. Review of the psychometric evidence of the perceived stress scale. *Asian Nurs Res (Korean Soc Nurs Sci)* 2012; 6(4): 121-127.
10. Allahverdipour H, Asgharijafarabadi M, Heshmati R, et al. Functional status, anxiety, cardiac self-efficacy, and health beliefs of patients with coronary heart disease. *Health Promot Perspect* 2013; 3(2): 217-229.
11. Pajak A, Jankowski P, Kotseva K, et al. Depression, anxiety, and risk factor control in patients after hospitalization for coronary heart disease: the EUROASPIRE III Study. *Eur J Prev Cardiol* 2013; 20(2): 331-340.
12. Jeff CH, Christopher MC, Scott RB, et al. Depression and cardiac disease:

1  
2  
3 epidemiology, mechanisms, and diagnosis. *Cardiovascular Psychiatry and Neurology*  
4 2013; 2013: 695925. doi: 10.1155/2013/695925.

5  
6  
7 13. Hare DL, Toukhsati SR, Johansson P, et al. Depression and cardiovascular disease:  
8 a clinical review. *Eur Heart J* 2014; 35(21): 1365-1372.

9  
10 14. Gu LX, Shen JZ. *Chen Style Tai Chi*. 2007, Beijing: People's Sport Publishing  
11 House of China.

12  
13 15. Tang H, Gu LX. The history and development of Tai Chi. In: *Study on Tai Chi*.  
14 2012, Beijing: People's Sport Publishing House of China.

15  
16 16. Sharma M, Haider T. Tai Chi as an alternative and complimentary therapy for  
17 anxiety: a systematic review. *J Evid Based Complementary Altern Med* 2015; 20(2):  
18 143-153.

19  
20 17. Wang F, Lee EK, Benson H, et al. The effects of tai chi on depression, anxiety and  
21 psychological well-being: a systematic review and meta-analysis. *Int J Behav Med*  
22 2014; 21(4): 605-617.

23  
24 18. Chi I, Jordan-Marsh M, Guo M, et al. Tai Chi and reduction of depressive  
25 symptoms for older adults: a meta-analysis of randomized trials. *Geriatr Gerontol Int*  
26 2013; 13(1): 3-12.

27  
28 19. Wang C, Bannuru R, Ramel J, et al. Tai Chi on psychological well-being:  
29 systematic review and meta-analysis. *BMC Complement Altern Med* 2010; 10: 23.

30  
31 20. Wang WC, Zhang AL, Rasmussen B, et al. The effect of Tai Chi on psychosocial  
32 well-being: a systematic review of randomized controlled trials. *J Acupunct Meridian*  
33 2009; 2(3): 171-181.

34  
35 21. Cochrane Training. Data collection forms for intervention reviews. Available from  
36 <http://training.cochrane.org/resource/data-collection-forms-intervention-reviews>  
37 (access 05 August 2016)

38  
39 22. Higgins JPT, Green S (editors). *Cochrane Handbook for Systematic Reviews of*  
40 *Interventions* Version 5.1.0 [updated March 2011]. The Cochrane Collaboration, 2011.  
41 Available from [www.cochrane-handbook.org](http://www.cochrane-handbook.org).

**Figure Legend**

Figure 1 - PRISMA Flow Diagram

Note: PRISMA, Preferred Reporting Items for Systematic Reviews and

Meta-Analyses: The PRISMA Statement, which is used worldwide to improve the reporting of systematic reviews and meta-analyses.

For peer review only

**PRISMA-P (Preferred Reporting Items for Systematic review and Meta-Analysis Protocols) 2015 checklist: recommended items to address in a systematic review protocol\***

| Section and topic                 | Item No | Checklist item                                                                                                                                                                                                                | Reported on page No |
|-----------------------------------|---------|-------------------------------------------------------------------------------------------------------------------------------------------------------------------------------------------------------------------------------|---------------------|
| <b>ADMINISTRATIVE INFORMATION</b> |         |                                                                                                                                                                                                                               |                     |
| Title:                            |         |                                                                                                                                                                                                                               |                     |
| Identification                    | 1a      | Identify the report as a protocol of a systematic review                                                                                                                                                                      | Title page          |
| Update                            | 1b      | If the protocol is for an update of a previous systematic review, identify as such                                                                                                                                            | No                  |
| Registration                      | 2       | If registered, provide the name of the registry (such as PROSPERO) and registration number                                                                                                                                    | #2                  |
| Authors:                          |         |                                                                                                                                                                                                                               |                     |
| Contact                           | 3a      | Provide name, institutional affiliation, e-mail address of all protocol authors; provide physical mailing address of corresponding author                                                                                     | Title page          |
| Contributions                     | 3b      | Describe contributions of protocol authors and identify the guarantor of the review                                                                                                                                           | #15                 |
| Amendments                        | 4       | If the protocol represents an amendment of a previously completed or published protocol, identify as such and list changes; otherwise, state plan for documenting important protocol amendments                               | No                  |
| Support:                          |         |                                                                                                                                                                                                                               |                     |
| Sources                           | 5a      | Indicate sources of financial or other support for the review                                                                                                                                                                 | #15                 |
| Sponsor                           | 5b      | Provide name for the review funder and/or sponsor                                                                                                                                                                             | No                  |
| Role of sponsor or funder         | 5c      | Describe roles of funder(s), sponsor(s), and/or institution(s), if any, in developing the protocol                                                                                                                            | No                  |
| <b>INTRODUCTION</b>               |         |                                                                                                                                                                                                                               |                     |
| Rationale                         | 6       | Describe the rationale for the review in the context of what is already known                                                                                                                                                 | #4-#6               |
| Objectives                        | 7       | Provide an explicit statement of the question(s) the review will address with reference to participants, interventions, comparators, and outcomes (PICO)                                                                      | #6                  |
| <b>METHODS</b>                    |         |                                                                                                                                                                                                                               |                     |
| Eligibility criteria              | 8       | Specify the study characteristics (such as PICO, study design, setting, time frame) and report characteristics (such as years considered, language, publication status) to be used as criteria for eligibility for the review | #6-#7               |
| Information sources               | 9       | Describe all intended information sources (such as electronic databases, contact with study authors, trial registers or other grey literature sources) with planned dates of coverage                                         | #8                  |
| Search strategy                   | 10      | Present draft of search strategy to be used for at least one electronic database, including planned limits, such that it could be repeated                                                                                    | #7 & Table 1        |

|                                    |     |                                                                                                                                                                                                                                                  |              |
|------------------------------------|-----|--------------------------------------------------------------------------------------------------------------------------------------------------------------------------------------------------------------------------------------------------|--------------|
| Study records:                     |     |                                                                                                                                                                                                                                                  |              |
| Data management                    | 11a | Describe the mechanism(s) that will be used to manage records and data throughout the review                                                                                                                                                     | #8           |
| Selection process                  | 11b | State the process that will be used for selecting studies (such as two independent reviewers) through each phase of the review (that is, screening, eligibility and inclusion in meta-analysis)                                                  | #8           |
| Data collection process            | 11c | Describe planned method of extracting data from reports (such as piloting forms, done independently, in duplicate), any processes for obtaining and confirming data from investigators                                                           | #9 & Table 2 |
| Data items                         | 12  | List and define all variables for which data will be sought (such as PICO items, funding sources), any pre-planned data assumptions and simplifications                                                                                          | #9 & Table 2 |
| Outcomes and prioritization        | 13  | List and define all outcomes for which data will be sought, including prioritization of main and additional outcomes, with rationale                                                                                                             | #8-#9        |
| Risk of bias in individual studies | 14  | Describe anticipated methods for assessing risk of bias of individual studies, including whether this will be done at the outcome or study level, or both; state how this information will be used in data synthesis                             | #12-#13      |
| Data synthesis                     | 15a | Describe criteria under which study data will be quantitatively synthesised                                                                                                                                                                      | #12-#14      |
|                                    | 15b | If data are appropriate for quantitative synthesis, describe planned summary measures, methods of handling data and methods of combining data from studies, including any planned exploration of consistency (such as $I^2$ , Kendall's $\tau$ ) |              |
|                                    | 15c | Describe any proposed additional analyses (such as sensitivity or subgroup analyses, meta-regression)                                                                                                                                            |              |
|                                    | 15d | If quantitative synthesis is not appropriate, describe the type of summary planned                                                                                                                                                               |              |
| Meta-bias(es)                      | 16  | Specify any planned assessment of meta-bias(es) (such as publication bias across studies, selective reporting within studies)                                                                                                                    | #13-#14      |
| Confidence in cumulative evidence  | 17  | Describe how the strength of the body of evidence will be assessed (such as GRADE)                                                                                                                                                               | #14          |

**\* It is strongly recommended that this checklist be read in conjunction with the PRISMA-P Explanation and Elaboration (cite when available) for important clarification on the items. Amendments to a review protocol should be tracked and dated. The copyright for PRISMA-P (including checklist) is held by the PRISMA-P Group and is distributed under a Creative Commons Attribution Licence 4.0.**

*From: Shamseer L, Moher D, Clarke M, Ghersi D, Liberati A, Petticrew M, Shekelle P, Stewart L, PRISMA-P Group. Preferred reporting items for systematic review and meta-analysis protocols (PRISMA-P) 2015: elaboration and explanation. BMJ. 2015 Jan 2;349(jan02 1):g7647.*

1  
2  
3  
4  
5  
6  
7  
8  
9  
10  
11  
12  
13  
14  
15  
16  
17  
18  
19  
20  
21  
22  
23  
24  
25  
26  
27  
28  
29  
30  
31  
32  
33  
34  
35  
36  
37  
38  
39  
40  
41  
42  
43  
44  
45  
46  
47  
48  
49  
50  
51  
52  
53  
54  
55  
56  
57  
58  
59  
60

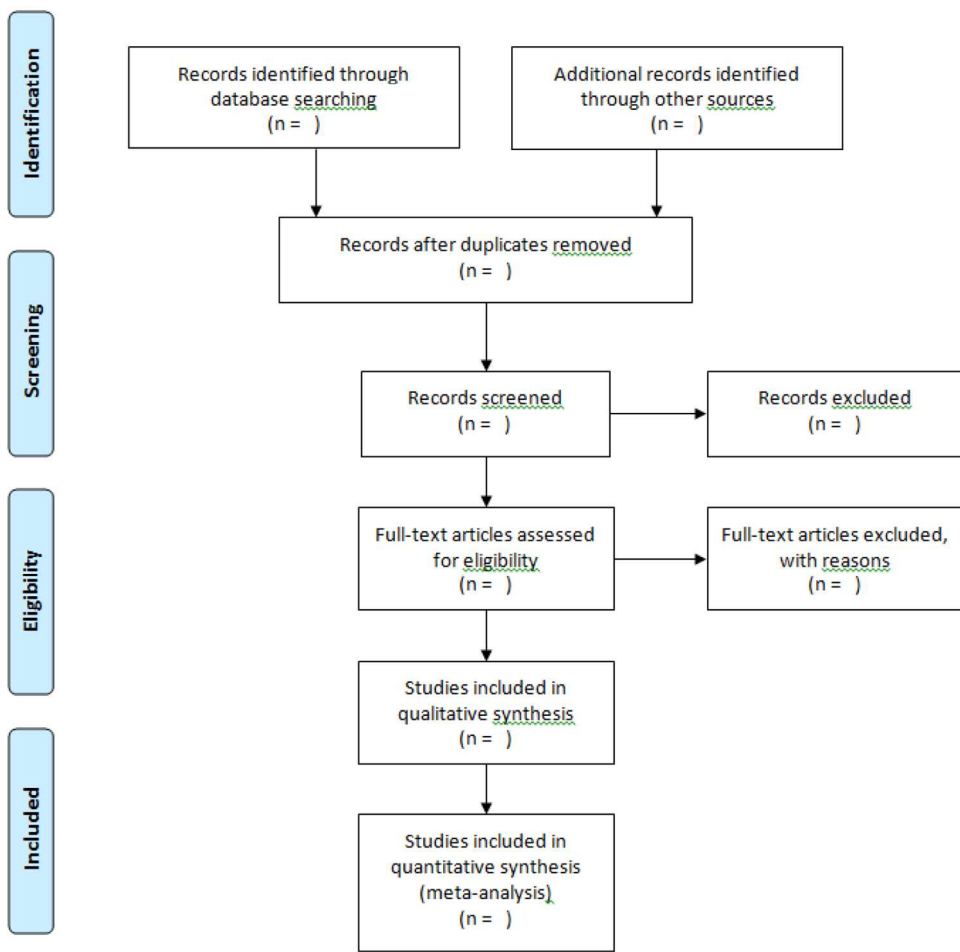

Figure 1 - PRISMA Flow Diagram

140x137mm (300 x 300 DPI)

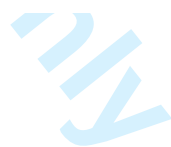

# BMJ Open

## Does Tai Chi improve psychological well-being and quality of life in patients with cardiovascular disease and/or cardiovascular risk factors? a systematic review protocol

|                                 |                                                                                                                                                                                                                                                                                                                                                                                                                                                                                                                                                                                                                                                                                                                                                                                                                                                                                                                                                                                                     |
|---------------------------------|-----------------------------------------------------------------------------------------------------------------------------------------------------------------------------------------------------------------------------------------------------------------------------------------------------------------------------------------------------------------------------------------------------------------------------------------------------------------------------------------------------------------------------------------------------------------------------------------------------------------------------------------------------------------------------------------------------------------------------------------------------------------------------------------------------------------------------------------------------------------------------------------------------------------------------------------------------------------------------------------------------|
| Journal:                        | <i>BMJ Open</i>                                                                                                                                                                                                                                                                                                                                                                                                                                                                                                                                                                                                                                                                                                                                                                                                                                                                                                                                                                                     |
| Manuscript ID                   | bmjopen-2016-014507.R1                                                                                                                                                                                                                                                                                                                                                                                                                                                                                                                                                                                                                                                                                                                                                                                                                                                                                                                                                                              |
| Article Type:                   | Protocol                                                                                                                                                                                                                                                                                                                                                                                                                                                                                                                                                                                                                                                                                                                                                                                                                                                                                                                                                                                            |
| Date Submitted by the Author:   | 04-May-2017                                                                                                                                                                                                                                                                                                                                                                                                                                                                                                                                                                                                                                                                                                                                                                                                                                                                                                                                                                                         |
| Complete List of Authors:       | <p>Yang, Guo-Yan; Western Sydney University School of Science and Health, National Institute of Complementary Medicine; Beijing University of Chinese Medicine, Centre for Evidence-Based Chinese Medicine</p> <p>Li, Yuan; Beijing University of Chinese Medicine, Centre for Evidence-Based Chinese Medicine</p> <p>Cao, Hui; Beijing University of Chinese Medicine, Centre for Evidence-Based Chinese Medicine</p> <p>Klupp, Nerida; Western Sydney University School of Science and Health, National Institute of Complementary Medicine</p> <p>Liu, Jianping; Beijing University of Traditional Chinese Medicine, Center for Evidence-Based Chinese Medicine</p> <p>Bensoussan, Alan; Western Sydney University, National Institute of Complementary Medicine</p> <p>Kiat, Hosen; University of New South Wales, Faculty of Medicine; Cardiac Health Institute</p> <p>Chang, Dennis; Western Sydney University School of Science and Health, National Institute of Complementary Medicine</p> |
| <b>Primary Subject Heading</b>: | Cardiovascular medicine                                                                                                                                                                                                                                                                                                                                                                                                                                                                                                                                                                                                                                                                                                                                                                                                                                                                                                                                                                             |
| Secondary Subject Heading:      | Complementary medicine, Sports and exercise medicine, Cardiovascular medicine                                                                                                                                                                                                                                                                                                                                                                                                                                                                                                                                                                                                                                                                                                                                                                                                                                                                                                                       |
| Keywords:                       | Tai Chi, well-being, stress, depression, anxiety, cardiovascular disease                                                                                                                                                                                                                                                                                                                                                                                                                                                                                                                                                                                                                                                                                                                                                                                                                                                                                                                            |
|                                 |                                                                                                                                                                                                                                                                                                                                                                                                                                                                                                                                                                                                                                                                                                                                                                                                                                                                                                                                                                                                     |

SCHOLARONE™  
Manuscripts

1  
2  
3 **Title: Does Tai Chi improve psychological well-being and quality of life in**  
4 **patients with cardiovascular disease and/or cardiovascular risk factors? a**  
5 **systematic review protocol**  
6  
7

8  
9 Guoyan Yang<sup>1,2</sup>, Wenyuan Li<sup>2</sup>, Huijuan Cao<sup>2</sup>, Nerida Klupp<sup>1</sup>, Jianping Liu<sup>2</sup>, Alan  
10 Bensoussan<sup>1</sup>, Hosen Kiat<sup>3,4,5,6</sup>, Dennis Chang<sup>1</sup>  
11

12  
13  
14 <sup>1</sup>National Institute of Complementary Medicine, Western Sydney University, Sydney,  
15 NSW 2751, Australia  
16

17  
18 <sup>2</sup>Center for Evidence-Based Chinese Medicine, Beijing University of Chinese  
19 Medicine, Beijing 100029, China  
20

21  
22 <sup>3</sup>Faculty of Medicine, University of New South Wales, Kensington, NSW 2052,  
23 Australia  
24

25  
26 <sup>4</sup>School of Medicine, University of Western Sydney, Locked Bag 1797, Penrith, NSW  
27 2751, Australia  
28

29  
30 <sup>5</sup>Faculty of Medicine and Health Sciences, Macquarie University, NSW 2109,  
31 Australia  
32

33  
34 <sup>6</sup>Cardiac Health Institute, Sydney, NSW 2122, Australia  
35

36  
37 Correspondence to:

38  
39 Dennis Chang

40  
41 National Institute of Complementary Medicine, Western Sydney University, Sydney,  
42 NSW 2751, Australia  
43

44  
45 Tel: +61 (02) 4620 3278

46  
47 Email: [D.Chang@westernsydney.edu.au](mailto:D.Chang@westernsydney.edu.au)  
48

49  
50 **Word count:** 2857 words  
51  
52  
53  
54  
55  
56  
57  
58  
59  
60



## ABSTRACT

**Introduction** Cardiovascular disease (CVD) is a leading cause of morbidity and mortality worldwide. Psychological risk factors such as stress, anxiety, and depression are known to play a significant and independent role in the development and progression of CVD and its risk factors. Tai Chi has been reported as potentially effective for health and well-being. It is of value to assess the effectiveness and safety of Tai Chi on psychological well-being and quality of life in people with CVD and/or cardiovascular risk factors.

**Methods and analysis** We will include all relevant randomised controlled trials on Tai Chi for stress, anxiety, depression, psychological well-being, and quality of life in people with CVD and cardiovascular risk factors. Literature searching will be conducted until 31<sup>st</sup> December 2016 from major English and Chinese databases. Two authors will conduct data selection and extraction independently. Quality assessment will be conducted using the risk of bias tool recommended by the Cochrane Collaboration. We will conduct data analysis using Cochrane's RevMan Software. Forest plots and summary of findings tables will illustrate the results from a meta-analysis if sufficient studies are identified.

**Ethics and dissemination** Ethics approval is not required as this study will not involve patients. The results of this study will be submitted to a peer-reviewed journal for publication, to inform both clinical practice and further research on Tai Chi and CVDs.

**Discussion** This review will summarize the evidence on Tai Chi for psychological well-being and quality of life in people with CVD and their risk factors. We anticipate that the results of this review would be useful for healthcare professionals and researchers on Tai Chi and CVDs.

**Trial registration number** International Prospective Register for Systematic Reviews

(PROSPERO) number CRD42016042905.

**Keywords:** Tai Chi, well-being, stress, depression, anxiety, cardiovascular disease

**Strengths and limitations of this study:**

- This systematic review will synthesise the evidence on Tai Chi for psychological well-being and quality of life in people with cardiovascular disease and risk factors for the first time.
- One limitation of this study is that significant heterogeneity may appear due to the variations in psychological measurements, durations, frequencies, styles (such as Chen, Yang, Wu, and Sun style) or forms (such as 24-form, 54-form, 83-form) of Tai Chi.
- Another limitation of this study is that the blinding of participants and personnel might not be possible in included studies which might affect the interpretation of results.

## INTRODUCTION

Cardiovascular disease (CVD) is the number one cause of morbidity and mortality worldwide, and an estimated 17.5 million people died from CVD in 2012 representing 31% of all global deaths<sup>1</sup>. In the UK, the total CVD mortality declined by 68% between 1980 and 2013, while the hospital admissions increased by over 46000 between 2010/2011 and 2013/2014<sup>2</sup>. Current statistics of premature deaths due to CVD ranges from 4% in high-income countries to astonishing estimate of 80% of the total CVD mortality occur in developing countries<sup>3</sup>. In addition, the disease burden on the individual and society comes not only from deaths, but also from those living with CVD. The American Heart Association estimated that the total direct and indirect cost of CVD in the US alone for 2010 was in excess of US\$500 billion<sup>4</sup>.

According to the World Health Organization (WHO)<sup>1</sup>, the major risk factors of CVD are related to lifestyles, including tobacco smoking, unhealthy diet, physical inactivity and alcohol abuse. These factors may lead to other contributing risk factors of CVD, such as hypertension, diabetes, dyslipidaemia, overweight and obesity. Other determinants of CVD include poverty, stress, depression, anxiety, ageing and hereditary factors.

Psychological risk factors such as stress, anxiety, and depression are known to play a significant and independent role in the pathogenesis and progression of CVD and its risk factors, with many of these factors being correlated with each other<sup>5-9</sup>. Stress in research focuses on three major perspectives: environmental (focusing on stressors or life events), psychological (assessing subjective stress appraisal and affective reactions), and biological (assessing the activation of the physiological systems involved in the stress response)<sup>10</sup>. Anxiety has been defined as a stimulus, a trait, a motive and a drive, which can be differentiated into state anxiety (an emotional condition at a period of time), and trait anxiety (a personality characteristic)<sup>11</sup>. The prevalence of anxiety in people with coronary heart disease varies from 12.0% to 41.8% in men, and 21.5% to 63.7% in women<sup>12</sup>. We define depression as either elevated

1  
2  
3 depressive symptoms on a validated depression scale or a formal diagnosis of major  
4 depressive disorder. Between 31-45% of people with coronary heart disease suffer  
5 from clinically significant depressive symptoms, and 15-20% of them meet criteria of  
6 major depressive disorder which is roughly threefold higher than in the general  
7 population<sup>13</sup>. It is now well established that depression is related not only to the  
8 incidence of CVD but also an independent risk factor for cardiac morbidity and  
9 mortality. Therefore, psychological management is necessary for people with CVD.  
10  
11  
12  
13  
14  
15  
16  
17

18 Most CVDs can be prevented by addressing these risk factors mentioned above.  
19 Medical treatment is necessary for people with hypertension, diabetes, and  
20 dyslipidemia to reduce cardiovascular risk and prevent heart attacks and strokes<sup>1</sup>. For  
21 people with established CVD, it is important to prevent the occurrence of further  
22 cardiovascular events such as acute myocardial infarction. However, major treatments  
23 target only at physical conditions. There is still insufficient evidence to support the  
24 introduction of psychological management strategies for people with CVD including  
25 cardiac rehabilitation and exercise programs, general support, cognitive behavioral  
26 therapy, anti-depressant medication, and combined approaches<sup>9, 14</sup>. Acceptable and  
27 effective psychological interventions for people with CVD and/or cardiovascular risk  
28 factors are warranted.  
29  
30  
31  
32  
33  
34  
35  
36  
37  
38  
39  
40

41 Tai Chi originated in China and purportedly developed by a famous martial artist  
42 Wang-Ting Chen towards the end of Ming Dynasty (18<sup>th</sup> Century A.D.)<sup>15</sup>. Tai Chi  
43 comprehensively incorporates the essence of Chinese folk and military martial arts,  
44 ancient breathing and meditative techniques, Chinese philosophy of *yin* and *yang*, and  
45 traditional Chinese medicine theory<sup>16</sup>. In recent years, studies on Tai Chi for CVDs  
46 and risk factors have flourished. An increasing amount of studies have demonstrated  
47 multiple physical and psychological benefits of Tai Chi, including reduction of stress,  
48 anxiety, depression, and improving quality of life.  
49  
50  
51  
52  
53  
54  
55  
56  
57

58 Five systematic reviews<sup>17-21</sup> have reported the beneficial effects of Tai Chi on  
59  
60

1  
2  
3  
4  
5  
6  
7  
8  
9  
10  
11  
12  
13  
14  
15  
16  
17  
18  
19  
20  
21  
22  
23  
24  
25  
26  
27  
28  
29  
30  
31  
32  
33  
34  
35  
36  
37  
38  
39  
40  
41  
42  
43  
44  
45  
46  
47  
48  
49  
50  
51  
52  
53  
54  
55  
56  
57  
58  
59  
60

psychological well-being, including reduction of stress, anxiety, and depression in wide population, but the findings showed methodological limitations of included trials, variations in study design or comparisons, heterogeneous outcomes or small sample size. Two out of the five systematic reviews only searched literature from English databases<sup>17,21</sup>. Wang C et al.<sup>20</sup> summarized and analyzed 40 studies (including RCT, non-randomised trials and observational studies), in which 29 psychological measurements were identified, and concluded that Tai Chi significantly improved psychological well-being including reduced stress, anxiety, depression and mood disturbance and increased self-esteem. Recently, more clinical trials have been published in this area. However, little is known about the effect of Tai Chi for psychological well-being and quality of life measured by validated instruments specifically in people with CVD and/or cardiovascular risk factors.

The objective of this systematic review is to assess the effectiveness and safety of Tai Chi intervention for stress, anxiety, depression, other psychological well-being and quality of life in people with CVD and/or cardiovascular risk factors.

## **METHODS and ANALYSIS**

### **Inclusion and Exclusion Criteria**

#### *Type of study*

We will include only parallel randomised controlled trials (RCT) and only the first phase data and outcomes of randomised cross-over trials will be used in any data analysis.

#### *Type of participants*

We will include participants aged 40 years or older with a diagnosis of a cardiovascular disease (such as coronary heart disease, stroke, heart failure, myocardial infarction and hypertension) or with cardiovascular risk factors (including hypertension, diabetes, and/or dyslipidemia). No limitation of gender will be applied.

### Type of intervention

Any types of Tai Chi will be eligible, regardless of the forms (such as 24-form, 54-form, 83-form Tai Chi), styles (such as Chen, Yang, Wu and Sun style). The duration should be at least one month with a frequency at least once per week.

### Type of control

No treatment, other forms of exercise, or conventional treatment will be eligible. Comparisons will also include a co-intervention if applied in all arms.

### Type of outcome

The primary outcomes are psychological status of stress measured by validated instruments and adverse events. The secondary outcomes are other psychological status including anxiety, depression, mood disturbance, self-esteem and quality of life measured by validated instruments.

### **Search Strategies**

We aim to identify all relevant RCTs regardless of language or publication status (e.g. published, unpublished, in press, or in progress). The English searching terms will include “Tai Chi”, “Tai Chi Chuan”, “Tai Chi Chih”, “ta’i chi”, “Tai Ji Quan”, “taijiquan”, “cardiovascular disease”, “coronary heart disease”, “stroke”, “heart failure”, “hypertension”, “high blood pressure”, “diabetes”, “dyslipidemia”, “high cholesterol”, “randomized controlled trial”, “randomised controlled trial”, “controlled clinical trial”, “randomly”, “clinical”, “trial”, “random”, “randomised” and “randomized”. The Chinese searching terms will include Tai Chi (“*Tai\_ji*”, or “*Tai\_ji\_chuan*”), cardiovascular disease (“*Xin\_xue\_guan\_bing*”), cardiovascular risk factors (“*Gao\_xue\_ya* (hypertension)”, “*Tang\_niao\_bing* (diabetes)”, “*Gao\_xue\_zhi* (dyslipidemia)”) and randomized (“*sui\_ji*”). Examples of detailed search strategies for one English database and one Chinese database are available in Table 1 (See Table 1). We will apply a similar strategy for other electronic databases.

Table 1 – Search strategies

| Database | Number | Search items                                                                                                                                                                                                                                                                                                                                                    |
|----------|--------|-----------------------------------------------------------------------------------------------------------------------------------------------------------------------------------------------------------------------------------------------------------------------------------------------------------------------------------------------------------------|
| PubMed   | #1     | [Title/Abstract] (“Tai Chi” OR “Tai ji” OR “Tai Chi Chih” OR “Ta’i chi” OR “taichi” OR “tai chi chuan” OR “taichi chuan” OR “taiji” OR “Tai Ji Quan” OR “taijiquan” OR “martial arts”)                                                                                                                                                                          |
|          | #2     | [Title/Abstract] (“cardiovascular disease” OR “coronary heart disease” OR “stroke” OR “heart failure” OR “hypertension” OR “high blood pressure” OR “diabetes” OR “dyslipidaemia” OR “high cholesterol”)                                                                                                                                                        |
|          | #3     | [All fields] (“randomized controlled trial” OR “randomised controlled trial” OR “controlled clinical trial” OR “randomly” OR “clinical” OR “trial” OR “random” OR “randomised” OR “randomized”)                                                                                                                                                                 |
|          | #4     | #1 and #2 and 3#                                                                                                                                                                                                                                                                                                                                                |
| CNKI     | #1     | [Abstract] (“ <i>Tai_ji</i> ” (Tai Chi) OR “ <i>Tai_ji_quan</i> ” (Tai Chi))                                                                                                                                                                                                                                                                                    |
|          | #2     | [Abstract] (“ <i>Xin_xue_guan_bing</i> ” (cardiovascular disease) OR “ <i>Guan_xin_bing</i> ” (coronary heart disease) OR “ <i>Zhong_feng</i> ” (stroke) OR “ <i>Nao_zu_zhong</i> ” (stroke) OR “ <i>Xin_Shuai</i> ” (heart failure) OR “ <i>Gao_xue_ya</i> ” (hypertension) OR “ <i>Tang_niao_bing</i> ” (diabetes) OR “ <i>Gao_xue_zhi</i> ” (dyslipidaemia)) |
|          | #3     | [All fields] (“ <i>sui_ji</i> ” (randomized or randomised))                                                                                                                                                                                                                                                                                                     |
|          | #4     | #1 and #2 and 3#                                                                                                                                                                                                                                                                                                                                                |

Note: CNKI, China National Knowledge Infrastructure.

We will conduct electronic searches from the following databases until 31<sup>st</sup> December 2016: Cochrane Heart Review Group Specialised Trials Register, Cochrane Central Register of Controlled Trials (CENTRAL), Cochrane Library (2017, Issue 1), MEDLINE (from 1946), EMBASE (from 1974), PubMed (from 1966), Sino-Med database (CBM, from 1978), China National Knowledge Infrastructure (CNKI, from 1979), VIP Journal Integration Platform (VJIP, from 1989), and Wanfang Data Chinese database (from 1985).

We will also search the following trials registers to identify those completed trials and request for unpublished data until 31<sup>st</sup> December 2016: Current Controlled Trials ([www.controlled-trials.com](http://www.controlled-trials.com)), US National Institutes of Health Ongoing Trials Register ([www.clinicaltrials.gov](http://www.clinicaltrials.gov)), Australian New Zealand Clinical Trials Registry

(www.anzctr.org.au), and the World Health Organization International Clinical Trials Registry platform (www.who.int/trialsearch). Additional clinical trials will be identified by searching the reference lists of relevant trials. Authors of identified studies will be also contacted to identify other studies.

## Data Selection and Extraction

### Selection of studies

Two authors (GYG and WYL) will screen the titles and abstracts independently. We will retrieve full texts of all potentially relevant studies. Any disagreement about the selection of studies will be resolved by discussion, and another author will arbitrate when necessary. The selection procedure is shown in a PRISMA flow chart (See figure 1).

### Data Extraction and Management

Two authors (GYG and WYL) will extract the data from the included trials independently by using Epidata 2.8 software. Any disagreements will be resolved by discussion with a third author. The extracted data will include the following information: (1) publication information: authors, country, journal name, year of publication.; (2) study designs: method of random number generation and allocation concealment, details of blinding methods; (3) participants: sample size, characteristics of participants (e.g. age, gender, duration of disorder, and severity of disorder); (4) intervention: type and/or form of Tai Chi, details of treatment and control; and (5) outcome data: outcomes measures, main data of the outcomes. In case of missing data or having unclear information, we will contact the original authors to clarify the information. A pre-defined data extraction form developed based on the recommendation of the Cochrane Collaboration<sup>22</sup> is available in **Table 2**.

**Table 2** – Data extraction form

|                                                                                                  |  |
|--------------------------------------------------------------------------------------------------|--|
| Review title or ID                                                                               |  |
| Study ID ( <i>surname of first author and year first full report of study was published e.g.</i> |  |



|                                                                                                                                                                 |  |
|-----------------------------------------------------------------------------------------------------------------------------------------------------------------|--|
| Smith 2001)                                                                                                                                                     |  |
| <b>General Information</b>                                                                                                                                      |  |
| Date form completed<br>(dd/mm/yyyy)                                                                                                                             |  |
| Name/ID of person extracting data                                                                                                                               |  |
| Reference citation                                                                                                                                              |  |
| Study author contact details                                                                                                                                    |  |
| <b>Study Methods</b> (extract information from descriptions as stated in report/paper)                                                                          |  |
| <b>Design</b> (e.g. parallel, crossover)                                                                                                                        |  |
| <b>Start date</b>                                                                                                                                               |  |
| <b>End date</b>                                                                                                                                                 |  |
| <b>Duration of participation</b> (from recruitment to last follow-up)                                                                                           |  |
| <b>Participants</b> (extract the description as stated in report/paper. Include comparative information for each intervention or comparison group if available) |  |
| Setting (including location and social context)                                                                                                                 |  |
| Inclusion criteria                                                                                                                                              |  |
| Exclusion criteria                                                                                                                                              |  |
| Total no. randomised                                                                                                                                            |  |
| Baseline imbalances                                                                                                                                             |  |
| Withdrawals and exclusions (if not provided below by outcome)                                                                                                   |  |
| Age                                                                                                                                                             |  |
| Sex                                                                                                                                                             |  |
| Illness and Severity                                                                                                                                            |  |
| Co-morbidities                                                                                                                                                  |  |
| Other relevant socio-demographics                                                                                                                               |  |
| Subgroups measured                                                                                                                                              |  |
| Subgroups reported                                                                                                                                              |  |
| <b>Intervention groups</b> (extract the description as stated in report/paper. Copy and paste table for each intervention and comparison group)                 |  |
| Group name                                                                                                                                                      |  |
| No. randomised to group                                                                                                                                         |  |

|                                                    |                                                                                                                     |                                                                                           |
|----------------------------------------------------|---------------------------------------------------------------------------------------------------------------------|-------------------------------------------------------------------------------------------|
| 1<br>2<br>3<br>4<br>5<br>6<br>7                    | Description ( <i>include sufficient details, e.g. style, form, components</i> )                                     |                                                                                           |
| 8<br>9                                             | Duration of treatment                                                                                               |                                                                                           |
| 10<br>11<br>12<br>13                               | Timing ( <i>e.g. frequency, duration of each practice</i> )                                                         |                                                                                           |
| 14<br>15<br>16<br>17                               | Learning method ( <i>e.g. DVD, instructors, one-to-one, in group</i> )                                              |                                                                                           |
| 18<br>19<br>20<br>21<br>22                         | Providers ( <i>e.g. a Tai Chi instructor with 10 years of experience etc. if relevant</i> )                         |                                                                                           |
| 23<br>24                                           | Co-interventions                                                                                                    |                                                                                           |
| 25<br>26                                           | Compliance                                                                                                          |                                                                                           |
| 27<br>28<br>29                                     | <b>Outcomes</b> (extract the description as stated in report/paper. <i>Copy and paste table for each outcome.</i> ) |                                                                                           |
| 30                                                 | Outcome name                                                                                                        |                                                                                           |
| 31<br>32<br>33<br>34<br>35                         | Time points measured ( <i>specify whether from start or end of intervention</i> )                                   |                                                                                           |
| 36<br>37                                           | Time points reported                                                                                                |                                                                                           |
| 38<br>39<br>40<br>41                               | Outcome definition ( <i>with diagnostic criteria if relevant</i> )                                                  |                                                                                           |
| 42<br>43<br>44                                     | Person measuring/ reporting                                                                                         |                                                                                           |
| 45<br>46<br>47<br>48<br>49                         | Scales: upper and lower limits ( <i>indicate whether high or low score is good</i> )                                |                                                                                           |
| 50<br>51                                           | Is outcome/tool validated?                                                                                          | <input type="checkbox"/> Yes <input type="checkbox"/> No <input type="checkbox"/> Unclear |
| 52<br>53<br>54<br>55<br>56<br>57<br>58<br>59<br>60 | Imputation of missing data ( <i>e.g. assumptions made for ITT analysis</i> )                                        |                                                                                           |

|                                                                                 |                            |                          |                          |                          |                                                                                         |                  |  |
|---------------------------------------------------------------------------------|----------------------------|--------------------------|--------------------------|--------------------------|-----------------------------------------------------------------------------------------|------------------|--|
| Assumed risk estimate<br>(e.g. baseline or population risk noted in Background) |                            |                          |                          |                          |                                                                                         |                  |  |
| <b>Results</b>                                                                  | <i>Dichotomous outcome</i> | <b>Intervention</b>      |                          | <b>Comparison</b>        |                                                                                         |                  |  |
|                                                                                 |                            | No. with event           | Total in group           | No. with event           | Total in group                                                                          |                  |  |
|                                                                                 |                            |                          |                          |                          |                                                                                         |                  |  |
| <i>Continuous outcome</i>                                                       | <b>Intervention</b>        |                          |                          | <b>Comparison</b>        |                                                                                         |                  |  |
|                                                                                 | Mean                       | SD                       | No. Participants         | Mean                     | SD                                                                                      | No. Participants |  |
|                                                                                 |                            |                          |                          |                          |                                                                                         |                  |  |
| <b>Risk of Bias assessment</b>                                                  |                            |                          |                          |                          |                                                                                         |                  |  |
| Domain                                                                          |                            | Risk of bias             |                          |                          | Support for judgement (include direct quotes where available with explanatory comments) |                  |  |
|                                                                                 |                            | Low                      | High                     | Unclear                  |                                                                                         |                  |  |
| Random sequence generation (selection bias)                                     |                            | <input type="checkbox"/> | <input type="checkbox"/> | <input type="checkbox"/> |                                                                                         |                  |  |
| Allocation concealment (selection bias)                                         |                            | <input type="checkbox"/> | <input type="checkbox"/> | <input type="checkbox"/> |                                                                                         |                  |  |
| Blinding of outcome assessment (detection bias)                                 |                            | <input type="checkbox"/> | <input type="checkbox"/> | <input type="checkbox"/> |                                                                                         |                  |  |
| Incomplete outcome data (attrition bias)                                        |                            | <input type="checkbox"/> | <input type="checkbox"/> | <input type="checkbox"/> |                                                                                         |                  |  |
| Selective outcome reporting? (reporting bias)                                   |                            | <input type="checkbox"/> | <input type="checkbox"/> | <input type="checkbox"/> |                                                                                         |                  |  |
| Other bias                                                                      |                            | <input type="checkbox"/> | <input type="checkbox"/> | <input type="checkbox"/> |                                                                                         |                  |  |
| <b>Other information</b> (extract the description as stated in report/paper)    |                            |                          |                          |                          |                                                                                         |                  |  |
| Key conclusions of authors                                                      |                            |                          |                          |                          |                                                                                         |                  |  |
| Notes:                                                                          |                            |                          |                          |                          |                                                                                         |                  |  |

**Quality Assessment**

We will use the risk of bias tool provided by the Cochrane Handbook for Systematic Reviews of Interventions <sup>23</sup> to assess the methodical quality of included studies. We

1  
2  
3 will assess the following categories of bias for each study: selection bias (random  
4 sequence generation and allocation concealment); detection bias (blinding of outcome  
5 assessment); attrition bias (incomplete outcome data); reporting bias (selective  
6 reporting); and other bias. We will not report performance bias, considering the  
7 difficulty to blind the participants and personnel in Tai Chi study. For each item, there  
8 are three potential bias judgements: 'low risk', 'high risk', or 'unclear risk'. A clinical  
9 trial meeting all criteria will be judged as having a low risk of bias, a trial meeting  
10 none of the criteria will be judged as having a risk of bias, and a trial with insufficient  
11 information to judge will be classified as unclear risk of bias. Any disagreements will  
12 be resolved by discussion, with involvement a third author where necessary.  
13  
14  
15  
16  
17  
18  
19  
20  
21  
22  
23

### 24 **Data Synthesis**

25 We will summarise data using risk ratios (RR) with 95% confidence intervals (CI) for  
26 dichotomous outcomes or mean difference (MD) with 95% CI for continuous  
27 outcomes. We will assess clinical heterogeneity according to the characteristics of the  
28 included studies and the participants, details of the intervention or control, and types  
29 of outcome measurements. We will assess statistical heterogeneity by using the  $I^2$   
30 statistic, and heterogeneity will be regarded as substantial if the  $I^2$  statistic is greater  
31 than 50%.  
32  
33  
34  
35  
36  
37  
38  
39  
40

41 We will perform statistical analyses by the Cochrane's Review Manager software  
42 (version 5.3). We will pool data if the  $I^2$  statistic is less than 75% and the clinical  
43 heterogeneity among trials is acceptable. We will use random-effects model to  
44 conduct the meta-analysis unless the  $I^2$  statistic is less than 25%. Forest plots will  
45 visualise the results of the meta-analysis if there are more than 10 included trials in  
46 one meta-analysis.  
47  
48  
49  
50  
51

### 52 Subgroup analyses

53 To explore whether the treatment effects are different in different subgroups, we plan  
54 to conduct subgroup analyses for different psychological measurements, durations,  
55  
56  
57  
58  
59  
60

1  
2  
3 frequencies, styles (such as Chen, Yang, Wu and Sun style) or forms (such as 24-form,  
4 54-form and 83-form Tai Chi) of Tai Chi, if sufficient studies are identified. We will  
5 also calculate the incidence rates of different types of adverse events.  
6  
7  
8  
9

### 10 Sensitivity analysis

11 To ensure the robustness of evidence, we will perform sensitivity analysis to assess  
12 the impact of studies with high risk of bias. We will compare the results to decide  
13 whether studies with lower quality should be excluded on the basis of sample size,  
14 strength of evidence and influence on pooled effect size.  
15  
16  
17  
18  
19

### 20 **Grading the quality of evidence**

21 We will generate 'Summary of findings' (SoF) tables for the primary outcomes using  
22 GRADEPro software (version 3.2), to assist health decision-making for individual  
23 patients. The SoF tables will demonstrate the overall quality of the body of evidence  
24 for clinical outcomes only from results of meta-analysis, by using Grading of  
25 Recommendations Assessment, Development and Evaluation (GRADE) criteria  
26 (study limitations, consistency of effect, imprecision, indirectness, and publication  
27 bias).  
28  
29  
30  
31  
32  
33  
34  
35  
36  
37  
38

### 39 **ETHICS AND DISSEMINATION**

40 Formal ethical approval is not required because all data used in this study will be  
41 anonymous with no concerns regarding privacy. This systematic review will  
42 summarize the evidence on the effectiveness and safety of Tai Chi for psychological  
43 well-being and quality of life in people with CVD and CVD risk factors. The results  
44 of this study will be disseminated through a peer-reviewed journal for publication.  
45  
46  
47  
48  
49

### 50 **DISCUSSION**

51 Results from this systematic review will be valuable for clinical practice and research  
52 on Tai Chi and CVD. To the best of our knowledge, this is the first systematic review  
53 that will examine Tai Chi on psychological well-being and quality of life in people  
54  
55  
56  
57  
58  
59  
60

1  
2  
3 with CVD and/or CVD risk factors. The findings of this systematic review may be  
4 applied in clinical practice for the prevention, treatment and rehabilitation of CVDs.  
5  
6 Gaps in the literature will be identified to provide implications for future research on  
7  
8 Tai Chi for CVD.  
9

10  
11  
12 One limitation of this study is that significant heterogeneity may appear due to the  
13 various styles (such as Chen, Yang, Wu and Sun style) and forms (such as 24-form,  
14 54-form and 83-form Tai Chi) of Tai Chi, durations and frequencies. We plan to  
15 conduct subgroup analyses to explore the differences between different subgroups.  
16  
17 Another limitation of this study is that performance bias of included studies might be  
18 at high risk, because blinding of participants and personnel in included studies is  
19 unlikely. We plan to report the blinding of outcome assessment, and conduct  
20 sensitivity analysis to assess the impact of studies with high risk of bias.  
21  
22  
23  
24  
25  
26  
27  
28  
29

### 30 **Authors' contributions**

31 GYY, NK and DC designed and conceived the study. GYY drafted and revised the  
32 study protocol with contributions from WYL, HJC, NK, JPL, AB, HK and DC. GYY  
33 and WYL will conduct literature search and selection. GYY and WYL will  
34 independently perform data extraction and assessment of quality. GYY will conduct  
35 the data analysis. All authors read and approved the final manuscript of the study  
36 protocol.  
37  
38  
39  
40  
41  
42  
43  
44

### 45 **Acknowledgments**

46 This research received no specific grant from any funding agency in the public,  
47 commercial or not-for-profit sectors. However, the first author (GYY) was supported  
48 by the Research Training Scheme from Western Sydney University, International  
49 Postgraduate Research Scholarship (IPRS) and Australian Postgraduate Award  
50 (International) from Western Sydney University.  
51  
52  
53  
54  
55  
56  
57

### 58 **Competing interest**

The authors declare no competing interests.

## REFERENCES

1. WHO. Cardiovascular disease (CVDs). 2015. Available at <http://www.who.int/mediacentre/factsheets/fs317/en> (accessed 05 September, 2016).
2. Bhatnagar P, Wickramasinghe K, Wilkins E, et al. Trends in the epidemiology of cardiovascular disease in the UK. *Heart* Published Online First: 22 August 2016. doi: 10.1136/heartjnl-2016-309573.
3. Mendis S, Puska P, Norrving B. Global Atlas on Cardiovascular Disease Prevention and Control. 2011, Geneva: World Health Organization.
4. Lloyd-Jones D, Adams RJ, Brown TM, et al. Heart disease and stroke statistics-2010 update. *Circulation* 2010; 121 (7): e46-e215.
5. Albus C. Psychological and social factors in coronary heart disease. *Ann Med* 2010; 42(7): 487-494.
6. Nekouei ZK, Doost HT, Yousefy A, et al. The relationship of Alexithymia with anxiety-depression-stress, quality of life, and social support in coronary heart disease (A psychological model). *J Educ health Promot* 2014; 3: 68.
7. Player MS, Peterson LE. Anxiety disorder, hypertension, and cardiovascular risk: a review. *Int J Psychiatry Med* 2011; 41(4): 365-377.
8. Wiltink J, Beutel ME, Till Y, et al. Prevalence of distress, comorbid conditions and well-being in the general population. *J Affect Disord* 2011; 130(3): 429-437.
9. Lavie CJ, Menezes AR, De Schutter A, et al. Impact of cardiac rehabilitation and exercise training on psychological risk factors and subsequent prognosis in patients with cardiovascular disease. *Can J Cardiol* 2016; 32(10S2): S365-S373.
10. Lee EH. Review of the psychometric evidence of the perceived stress scale. *Asian Nurs Res (Korean Soc Nurs Sci)* 2012; 6(4): 121-127.
11. Allahverdipour H, Asgharijafarabadi M, Heshmati R, et al. Functional status, anxiety, cardiac self-efficacy, and health beliefs of patients with coronary heart disease. *Health Promot Perspect* 2013; 3(2): 217-229.
12. Pajak A, Jankowski P, Kotseva K, et al. Depression, anxiety, and risk factor

1  
2  
3 control in patients after hospitalization for coronary heart disease: the EUROASPIRE  
4 III Study. *Eur J Prev Cardiol* 2013; 20(2): 331-340.

5  
6  
7 13. Jeff CH, Christopher MC, Scott RB, et al. Depression and cardiac disease:  
8 epidemiology, mechanisms, and diagnosis. *Cardiovascular Psychiatry and Neurology*  
9 2013; 2013: 695925. doi: 10.1155/2013/695925.

10  
11  
12 14. Hare DL, Toukhsati SR, Johansson P, et al. Depression and cardiovascular disease:  
13 a clinical review. *Eur Heart J* 2014; 35(21): 1365-1372.

14  
15  
16 15. Gu LX, Shen JZ. *Chen Style Tai Chi*. 2007, Beijing: People's Sport Publishing  
17 House of China.

18  
19  
20 16. Tang H, Gu LX. The history and development of Tai Chi. In: *Study on Tai Chi*.  
21 2012, Beijing: People's Sport Publishing House of China.

22  
23  
24 17. Sharma M, Haider T. Tai Chi as an alternative and complimentary therapy for  
25 anxiety: a systematic review. *J Evid Based Complementary Altern Med* 2015; 20(2):  
26 143-153.

27  
28  
29 18. Wang F, Lee EK, Benson H, et al. The effects of tai chi on depression, anxiety and  
30 psychological well-being: a systematic review and meta-analysis. *Int J Behav Med*  
31 2014; 21(4): 605-617.

32  
33  
34 19. Chi I, Jordan-Marsh M, Guo M, et al. Tai Chi and reduction of depressive  
35 symptoms for older adults: a meta-analysis of randomized trials. *Geriatr Gerontolnt*  
36 2013; 13(1): 3-12.

37  
38  
39 20. Wang C, Bannuru R, Ramel J, et al. Tai Chi on psychological well-being:  
40 systematic review and meta-analysis. *BMC Complement Altern Med* 2010; 10: 23.

41  
42  
43 21. Wang WC, Zhang AL, Rasmussen B, et al. The effect of Tai Chi on psychosocial  
44 well-being: a systematic review of randomized controlled trials. *J Acupunct Meridian*  
45 2009; 2(3): 171-181.

46  
47  
48 22. Cochrane Training. Data collection forms for intervention reviews. Available from  
49 <http://training.cochrane.org/resource/data-collection-forms-intervention-reviews>  
50  
51  
52  
53  
54  
55  
56  
57  
58  
59  
60  
(access 05 August 2016)

23. Higgins JPT, Green S (editors). *Cochrane Handbook for Systematic Reviews of  
Interventions Version 5.1.0 [updated March 2011]*. The Cochrane Collaboration, 2011.



1  
2  
3 Available from [www.cochrane-handbook.org](http://www.cochrane-handbook.org).  
4  
5  
6  
7

### 8 **Figure Legend**

9  
10 Figure 1 - PRISMA Flow Diagram

11 Note: PRISMA, Preferred Reporting Items for Systematic Reviews and

12 Meta-Analyses: The PRISMA Statement, which is used worldwide to improve the  
13 reporting of systematic reviews and meta-analyses.  
14  
15  
16  
17  
18  
19  
20  
21  
22  
23  
24  
25  
26  
27  
28  
29  
30  
31  
32  
33  
34  
35  
36  
37  
38  
39  
40  
41  
42  
43  
44  
45  
46  
47  
48  
49  
50  
51  
52  
53  
54  
55  
56  
57  
58  
59  
60

1  
2  
3  
4  
5  
6  
7  
8  
9  
10  
11  
12  
13  
14  
15  
16  
17  
18  
19  
20  
21  
22  
23  
24  
25  
26  
27  
28  
29  
30  
31  
32  
33  
34  
35  
36  
37  
38  
39  
40  
41  
42  
43  
44  
45  
46  
47  
48  
49  
50  
51  
52  
53  
54  
55  
56  
57  
58  
59  
60

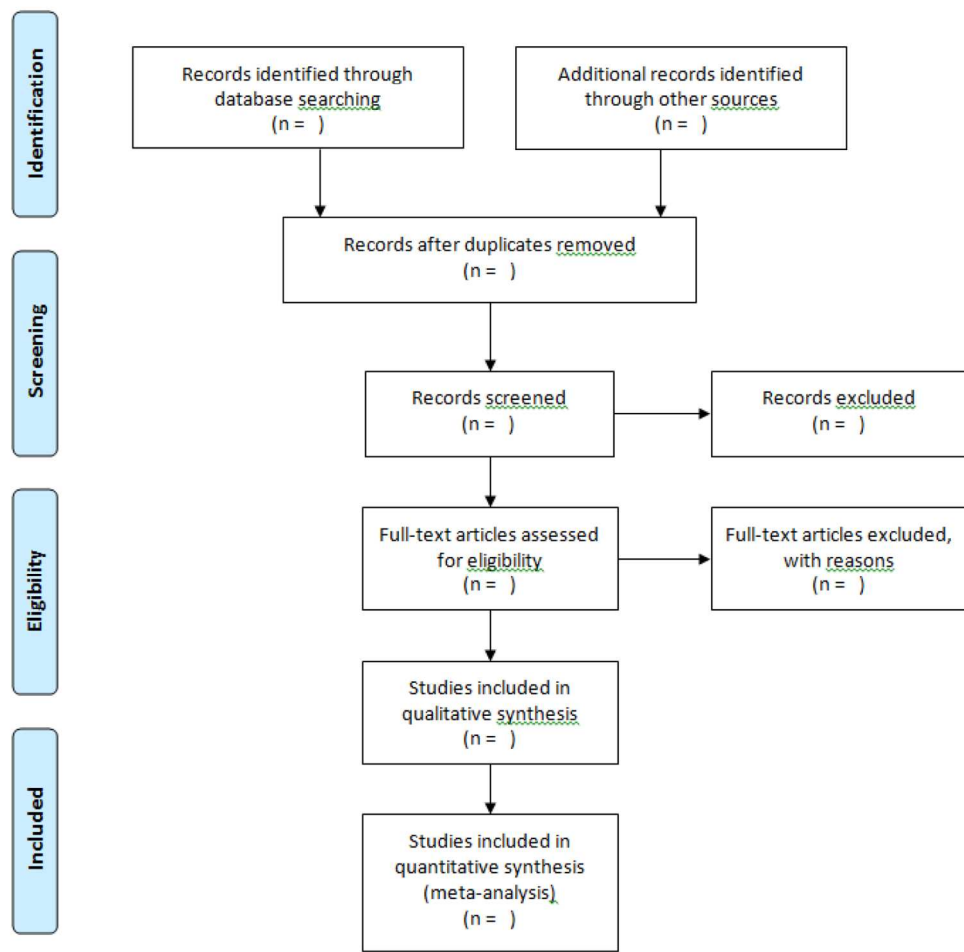

Figure 1 - PRISMA Flow Diagram  
140x137mm (300 x 300 DPI)

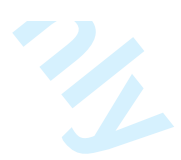

**PRISMA-P (Preferred Reporting Items for Systematic review and Meta-Analysis Protocols) 2015 checklist: recommended items to address in a systematic review protocol\***

| Section and topic                 | Item No | Checklist item                                                                                                                                                                                                                | Reported on page No |
|-----------------------------------|---------|-------------------------------------------------------------------------------------------------------------------------------------------------------------------------------------------------------------------------------|---------------------|
| <b>ADMINISTRATIVE INFORMATION</b> |         |                                                                                                                                                                                                                               |                     |
| Title:                            |         |                                                                                                                                                                                                                               |                     |
| Identification                    | 1a      | Identify the report as a protocol of a systematic review                                                                                                                                                                      | Title page          |
| Update                            | 1b      | If the protocol is for an update of a previous systematic review, identify as such                                                                                                                                            | No                  |
| Registration                      | 2       | If registered, provide the name of the registry (such as PROSPERO) and registration number                                                                                                                                    | #2                  |
| Authors:                          |         |                                                                                                                                                                                                                               |                     |
| Contact                           | 3a      | Provide name, institutional affiliation, e-mail address of all protocol authors; provide physical mailing address of corresponding author                                                                                     | Title page          |
| Contributions                     | 3b      | Describe contributions of protocol authors and identify the guarantor of the review                                                                                                                                           | #15                 |
| Amendments                        | 4       | If the protocol represents an amendment of a previously completed or published protocol, identify as such and list changes; otherwise, state plan for documenting important protocol amendments                               | No                  |
| Support:                          |         |                                                                                                                                                                                                                               |                     |
| Sources                           | 5a      | Indicate sources of financial or other support for the review                                                                                                                                                                 | #15                 |
| Sponsor                           | 5b      | Provide name for the review funder and/or sponsor                                                                                                                                                                             | No                  |
| Role of sponsor or funder         | 5c      | Describe roles of funder(s), sponsor(s), and/or institution(s), if any, in developing the protocol                                                                                                                            | No                  |
| <b>INTRODUCTION</b>               |         |                                                                                                                                                                                                                               |                     |
| Rationale                         | 6       | Describe the rationale for the review in the context of what is already known                                                                                                                                                 | #4-#6               |
| Objectives                        | 7       | Provide an explicit statement of the question(s) the review will address with reference to participants, interventions, comparators, and outcomes (PICO)                                                                      | #6                  |
| <b>METHODS</b>                    |         |                                                                                                                                                                                                                               |                     |
| Eligibility criteria              | 8       | Specify the study characteristics (such as PICO, study design, setting, time frame) and report characteristics (such as years considered, language, publication status) to be used as criteria for eligibility for the review | #6-#7               |
| Information sources               | 9       | Describe all intended information sources (such as electronic databases, contact with study authors, trial registers or other grey literature sources) with planned dates of coverage                                         | #8                  |
| Search strategy                   | 10      | Present draft of search strategy to be used for at least one electronic database, including planned limits, such that it could be repeated                                                                                    | #7 & Table 1        |

|                                    |     |                                                                                                                                                                                                                                                  |              |
|------------------------------------|-----|--------------------------------------------------------------------------------------------------------------------------------------------------------------------------------------------------------------------------------------------------|--------------|
| Study records:                     |     |                                                                                                                                                                                                                                                  |              |
| Data management                    | 11a | Describe the mechanism(s) that will be used to manage records and data throughout the review                                                                                                                                                     | #8           |
| Selection process                  | 11b | State the process that will be used for selecting studies (such as two independent reviewers) through each phase of the review (that is, screening, eligibility and inclusion in meta-analysis)                                                  | #8           |
| Data collection process            | 11c | Describe planned method of extracting data from reports (such as piloting forms, done independently, in duplicate), any processes for obtaining and confirming data from investigators                                                           | #9 & Table 2 |
| Data items                         | 12  | List and define all variables for which data will be sought (such as PICO items, funding sources), any pre-planned data assumptions and simplifications                                                                                          | #9 & Table 2 |
| Outcomes and prioritization        | 13  | List and define all outcomes for which data will be sought, including prioritization of main and additional outcomes, with rationale                                                                                                             | #8-#9        |
| Risk of bias in individual studies | 14  | Describe anticipated methods for assessing risk of bias of individual studies, including whether this will be done at the outcome or study level, or both; state how this information will be used in data synthesis                             | #12-#13      |
| Data synthesis                     | 15a | Describe criteria under which study data will be quantitatively synthesised                                                                                                                                                                      | #12-#14      |
|                                    | 15b | If data are appropriate for quantitative synthesis, describe planned summary measures, methods of handling data and methods of combining data from studies, including any planned exploration of consistency (such as $I^2$ , Kendall's $\tau$ ) |              |
|                                    | 15c | Describe any proposed additional analyses (such as sensitivity or subgroup analyses, meta-regression)                                                                                                                                            |              |
|                                    | 15d | If quantitative synthesis is not appropriate, describe the type of summary planned                                                                                                                                                               |              |
| Meta-bias(es)                      | 16  | Specify any planned assessment of meta-bias(es) (such as publication bias across studies, selective reporting within studies)                                                                                                                    | #13-#14      |
| Confidence in cumulative evidence  | 17  | Describe how the strength of the body of evidence will be assessed (such as GRADE)                                                                                                                                                               | #14          |

**\* It is strongly recommended that this checklist be read in conjunction with the PRISMA-P Explanation and Elaboration (cite when available) for important clarification on the items. Amendments to a review protocol should be tracked and dated. The copyright for PRISMA-P (including checklist) is held by the PRISMA-P Group and is distributed under a Creative Commons Attribution Licence 4.0.**

*From: Shamseer L, Moher D, Clarke M, Ghersi D, Liberati A, Petticrew M, Shekelle P, Stewart L, PRISMA-P Group. Preferred reporting items for systematic review and meta-analysis protocols (PRISMA-P) 2015: elaboration and explanation. BMJ. 2015 Jan 2;349(jan02 1):g7647.*
