# Supplementary material for: Does Tai Chi improve psychological well-being and quality of life in patients with cardiovascular disease and/or cardiovascular risk factors? A systematic review protocol
Source: PubMed Central journal article supplement — BMJ Open. 2017 Aug 18;7(8):e014507. doi: 10.1136/bmjopen-2016-014507 (PMC5724100; doi:10.1136/bmjopen-2016-014507), 2017-08-18
Supplement: bmjopen-2016-014507supp001.pdf [file bmjopen-2016-014507supp001.pdf]

**Supplementary Table 1** – Data extraction form

|                                                                                                                                                                         |  |
|-------------------------------------------------------------------------------------------------------------------------------------------------------------------------|--|
| Review title or ID                                                                                                                                                      |  |
| Study ID ( <i>surname of first author and year first full report of study was published e.g. Smith 2001</i> )                                                           |  |
| <b>General Information</b>                                                                                                                                              |  |
| Date form completed<br>( <i>dd/mm/yyyy</i> )                                                                                                                            |  |
| Name/ID of person extracting data                                                                                                                                       |  |
| Reference citation                                                                                                                                                      |  |
| Study author contact details                                                                                                                                            |  |
| <b>Study Methods</b> (extract information from descriptions as stated in report/paper)                                                                                  |  |
| <b>Design</b> ( <i>e.g. parallel, crossover</i> )                                                                                                                       |  |
| <b>Start date</b>                                                                                                                                                       |  |
| <b>End date</b>                                                                                                                                                         |  |
| <b>Duration of participation</b> ( <i>from recruitment to last follow-up</i> )                                                                                          |  |
| <b>Participants</b> (extract the description as stated in report/paper. <i>Include comparative information for each intervention or comparison group if available</i> ) |  |
| Setting ( <i>including location and social context</i> )                                                                                                                |  |
| Inclusion criteria                                                                                                                                                      |  |
| Exclusion criteria                                                                                                                                                      |  |
| Total no. randomised                                                                                                                                                    |  |
| Baseline imbalances                                                                                                                                                     |  |
| Withdrawals and exclusions ( <i>if not provided below by outcome</i> )                                                                                                  |  |
| Age                                                                                                                                                                     |  |
| Sex                                                                                                                                                                     |  |
| Illness and Severity                                                                                                                                                    |  |
| Co-morbidities                                                                                                                                                          |  |
| Other relevant socio-demographics                                                                                                                                       |  |

|                                                                                                                                                         |  |
|---------------------------------------------------------------------------------------------------------------------------------------------------------|--|
| Subgroups measured                                                                                                                                      |  |
| Subgroups reported                                                                                                                                      |  |
| <b>Intervention groups</b> (extract the description as stated in report/paper. <i>Copy and paste table for each intervention and comparison group</i> ) |  |
| Group name                                                                                                                                              |  |
| No. randomised to group                                                                                                                                 |  |
| Description ( <i>include sufficient details, e.g. style, form, components</i> )                                                                         |  |
| Duration of treatment                                                                                                                                   |  |
| Timing ( <i>e.g. frequency, duration of each practice</i> )                                                                                             |  |
| Learning method ( <i>e.g. DVD, instructors, one-to-one, in group</i> )                                                                                  |  |
| Providers ( <i>e.g. a Tai Chi instructor with 10 years of experience etc. if relevant</i> )                                                             |  |
| Co-interventions                                                                                                                                        |  |
| Compliance                                                                                                                                              |  |
| <b>Outcomes</b> (extract the description as stated in report/paper. <i>Copy and paste table for each outcome.</i> )                                     |  |
| Outcome name                                                                                                                                            |  |
| Time points measured ( <i>specify whether from start or end of intervention</i> )                                                                       |  |
| Time points reported                                                                                                                                    |  |
| Outcome definition ( <i>with diagnostic criteria if relevant</i> )                                                                                      |  |
| Person measuring/reporting                                                                                                                              |  |
| Scales: upper and lower limits ( <i>indicate whether high or low score is good</i> )                                                                    |  |

|                                                                                       |                                                                                           |                          |                          |                                                                                                  |                   |    |                  |
|---------------------------------------------------------------------------------------|-------------------------------------------------------------------------------------------|--------------------------|--------------------------|--------------------------------------------------------------------------------------------------|-------------------|----|------------------|
| Is outcome/tool validated?                                                            | <input type="checkbox"/> Yes <input type="checkbox"/> No <input type="checkbox"/> Unclear |                          |                          |                                                                                                  |                   |    |                  |
| Imputation of missing data ( <i>e.g. assumptions made for ITT analysis</i> )          |                                                                                           |                          |                          |                                                                                                  |                   |    |                  |
| Assumed risk estimate ( <i>e.g. baseline or population risk noted in Background</i> ) |                                                                                           |                          |                          |                                                                                                  |                   |    |                  |
| <b>Results</b>                                                                        | <i>Dichotomous outcome</i>                                                                | <b>Intervention</b>      |                          | <b>Comparison</b>                                                                                |                   |    |                  |
|                                                                                       |                                                                                           | No. with event           | Total in group           | No. with event                                                                                   | Total in group    |    |                  |
|                                                                                       |                                                                                           |                          |                          |                                                                                                  |                   |    |                  |
|                                                                                       | <i>Continuous outcome</i>                                                                 | <b>Intervention</b>      |                          |                                                                                                  | <b>Comparison</b> |    |                  |
|                                                                                       |                                                                                           | Mean                     | SD                       | No. Participants                                                                                 | Mean              | SD | No. Participants |
|                                                                                       |                                                                                           |                          |                          |                                                                                                  |                   |    |                  |
| <b>Risk of Bias assessment</b>                                                        |                                                                                           |                          |                          |                                                                                                  |                   |    |                  |
| Domain                                                                                | Risk of bias                                                                              |                          |                          | Support for judgement ( <i>include direct quotes where available with explanatory comments</i> ) |                   |    |                  |
|                                                                                       | Low                                                                                       | High                     | Unclear                  |                                                                                                  |                   |    |                  |
| Random sequence generation ( <i>selection bias</i> )                                  | <input type="checkbox"/>                                                                  | <input type="checkbox"/> | <input type="checkbox"/> |                                                                                                  |                   |    |                  |
| Allocation concealment ( <i>selection bias</i> )                                      | <input type="checkbox"/>                                                                  | <input type="checkbox"/> | <input type="checkbox"/> |                                                                                                  |                   |    |                  |
| Blinding of outcome assessment ( <i>detection bias</i> )                              | <input type="checkbox"/>                                                                  | <input type="checkbox"/> | <input type="checkbox"/> |                                                                                                  |                   |    |                  |
| Incomplete outcome data ( <i>attrition bias</i> )                                     | <input type="checkbox"/>                                                                  | <input type="checkbox"/> | <input type="checkbox"/> |                                                                                                  |                   |    |                  |
| Selective outcome reporting? ( <i>reporting bias</i> )                                | <input type="checkbox"/>                                                                  | <input type="checkbox"/> | <input type="checkbox"/> |                                                                                                  |                   |    |                  |
| Other bias                                                                            | <input type="checkbox"/>                                                                  | <input type="checkbox"/> | <input type="checkbox"/> |                                                                                                  |                   |    |                  |
| <b>Other information</b> (extract the description as stated in report/paper)          |                                                                                           |                          |                          |                                                                                                  |                   |    |                  |
| Key conclusions of authors                                                            |                                                                                           |                          |                          |                                                                                                  |                   |    |                  |
| Notes:                                                                                |                                                                                           |                          |                          |                                                                                                  |                   |    |                  |
